# Supplementary material
Source: PubMed Central journal article supplement (PMC5988115)

## Supplementary materials

**Table S1** Summary of safety findings (safety analysis set, N = 112)

|                                                                                  | Budesonide | Mesalazine |
|----------------------------------------------------------------------------------|------------|------------|
|                                                                                  | n = 56     | n = 56     |
| Patients with any adverse event, n (%)                                           | 26 (46)    | 25 (45)    |
| Patients with serious adverse event, n (%)                                       | 3 (5)      | 1 (2)      |
| Patients with adverse event leading to discontinuation, n (%)                    | 4 (7)      | 4 (7)      |
| Adverse events occurring in $\geq 5\%$ of patients in any treatment group, n (%) |            |            |
| Nasopharyngitis                                                                  | 6 (11)     | 10 (18)    |
| Pharyngitis                                                                      | 0 (0)      | 3 (5)      |
| Crohn's disease                                                                  | 1 (2)      | 3 (5)      |
| Vomiting                                                                         | 3 (5)      | 0 (0)      |
| Headache                                                                         | 3 (5)      | 0 (0)      |

**Table S2** Clinical chemistry findings (safety analysis set, N = 112)

| Variable                                       | Baseline        | Week 2          | Week 4          | Week 8          | Week 10         | LOCF            |
|------------------------------------------------|-----------------|-----------------|-----------------|-----------------|-----------------|-----------------|
| <b>Alanine aminotransferase, U/L</b>           |                 |                 |                 |                 |                 |                 |
| Budesonide                                     | 0.36<br>(0.30)  | 0.34<br>(0.26)  | 0.31<br>(0.21)  | 0.32<br>(0.22)  | 0.31<br>(0.22)  | 0.32<br>(0.21)  |
| Mesalazine                                     | 0.29<br>(0.17)  | 0.31<br>(0.17)  | 0.31<br>(0.16)  | 0.30<br>(0.18)  | 0.29<br>(0.17)  | 0.30<br>(0.19)  |
| <b>Alkaline phosphatase, U/L</b>               |                 |                 |                 |                 |                 |                 |
| Budesonide                                     | 4.39<br>(1.35)  | 3.98<br>(1.07)  | 3.80<br>(1.00)  | 3.63<br>(1.00)  | 3.86<br>(1.23)  | 3.92<br>(1.22)  |
| Mesalazine                                     | 4.42<br>(1.53)  | 4.38<br>(1.29)  | 4.42<br>(1.44)  | 4.25<br>(1.12)  | 4.31<br>(1.13)  | 4.45<br>(1.41)  |
| <b>Aspartate aminotransferase, U/L</b>         |                 |                 |                 |                 |                 |                 |
| Budesonide                                     | 0.35<br>(0.15)  | 0.30<br>(0.13)  | 0.28<br>(0.11)  | 0.30<br>(0.14)  | 0.31<br>(0.12)  | 0.32<br>(0.13)  |
| Mesalazine                                     | 0.30<br>(0.12)  | 0.32<br>(0.14)  | 0.32<br>(0.12)  | 0.32<br>(0.15)  | 0.32<br>(0.15)  | 0.32<br>(0.16)  |
| <b>Bilirubin, <math>\mu\text{mol/L}</math></b> |                 |                 |                 |                 |                 |                 |
| Budesonide                                     | 10.19<br>(6.43) | 10.96<br>(5.63) | 11.07<br>(6.04) | 11.48<br>(5.56) | 11.27<br>(5.26) | 11.41<br>(6.28) |
| Mesalazine                                     | 9.88<br>(7.69)  | 9.20<br>(6.94)  | 9.37<br>(6.08)  | 10.30<br>(6.20) | 10.23<br>(6.67) | 9.45<br>(6.22)  |
| <b>C-reactive protein, mg/L</b>                |                 |                 |                 |                 |                 |                 |

|                                 |         |         |         |         |         |         |
|---------------------------------|---------|---------|---------|---------|---------|---------|
| Budesonide                      | 12.32   | 7.92    | 7.01    | 7.03    | 13.13   | 17.36   |
|                                 | (16.70) | (15.16) | (11.64) | (10.45) | (20.99) | (28.73) |
| Mesalazine                      | 15.67   | 14.57   | 14.07   | 10.13   | 10.82   | 13.55   |
|                                 | (17.41) | (18.44) | (16.42) | (13.20) | (12.93) | (15.37) |
| Cholesterol, mmol/L             |         |         |         |         |         |         |
| Budesonide                      | 3.98    | 4.25    | 4.40    | 4.52    | 4.33    | 4.28    |
|                                 | (0.88)  | (0.95)  | (0.93)  | (1.08)  | (0.92)  | (0.93)  |
| Mesalazine                      | 3.47    | 3.53    | 3.55    | 3.63    | 3.60    | 3.54    |
|                                 | (0.83)  | (0.95)  | (0.92)  | (0.98)  | (0.90)  | (0.87)  |
| Creatinine, $\mu\text{mol/L}$ ) |         |         |         |         |         |         |
| Budesonide                      | 64.47   | 64.72   | 63.46   | 63.46   | 64.59   | 64.69   |
|                                 | (15.67) | (14.62) | (14.36) | (14.42) | (14.89) | (14.25) |
| Mesalazine                      | 63.85   | 63.31   | 63.91   | 62.12   | 63.27   | 63.43   |
|                                 | (13.53) | (12.50) | (13.93) | (14.22) | (14.18) | (13.47) |
| DHEA-S, $\mu\text{mol/L}$       |         |         |         |         |         |         |
| Budesonide                      | 3.78    | 2.63    | 2.38    | 2.44    | 3.10    | 3.22    |
|                                 | (2.20)  | (2.17)  | (2.12)  | (2.66)  | (2.04)  | (2.33)  |
| Mesalazine                      | 3.24    | 2.98    | 3.24    | 3.21    | 3.24    | 3.16    |
|                                 | (2.15)  | (1.98)  | (2.12)  | (2.21)  | (2.18)  | (2.16)  |
| Gamma-glutamyltransferase, U/L  |         |         |         |         |         |         |
| Budesonide                      | 0.42    | 0.43    | 0.40    | 0.38    | 0.38    | 0.42    |
|                                 | (0.25)  | (0.25)  | (0.22)  | (0.21)  | (0.25)  | (0.29)  |
| Mesalazine                      | 0.41    | 0.42    | 0.43    | 0.38    | 0.42    | 0.44    |
|                                 | (0.28)  | (0.24)  | (0.27)  | (0.19)  | (0.27)  | (0.29)  |
| Glucose, mmol/L                 |         |         |         |         |         |         |

|                   |        |        |        |        |        |        |
|-------------------|--------|--------|--------|--------|--------|--------|
| Budesonide        | 5.14   | 5.36   | 5.42   | 5.59   | 5.63   | 5.59   |
|                   | (0.84) | (1.02) | (1.05) | (2.21) | (1.22) | (1.18) |
| Mesalazine        | 5.40   | 5.46   | 5.28   | 5.67   | 5.74   | 5.68   |
|                   | (0.88) | (0.80) | (0.94) | (1.21) | (1.03) | (1.00) |
| Potassium, mmol/L |        |        |        |        |        |        |
| Budesonide        | 3.99   | 3.80   | 3.81   | 3.86   | 3.92   | 3.90   |
|                   | (0.29) | (0.37) | (0.30) | (0.35) | (0.33) | (0.33) |
| Mesalazine        | 3.98   | 3.97   | 4.07   | 4.00   | 3.99   | 3.99   |
|                   | (0.37) | (0.38) | (0.33) | (0.39) | (0.36) | (0.35) |
| Protein (g/L)     |        |        |        |        |        |        |
| Budesonide        | 71.61  | 70.95  | 70.83  | 70.81  | 70.64  | 70.65  |
|                   | (6.28) | (6.70) | (5.80) | (6.40) | (5.76) | (5.86) |
| Mesalazine        | 68.89  | 68.10  | 68.63  | 68.81  | 68.66  | 69.19  |
|                   | (7.23) | (6.48) | (6.56) | (7.93) | (7.17) | (7.69) |
| Sodium, mmol/L    |        |        |        |        |        |        |
| Budesonide        | 140.7  | 141.2  | 141.3  | 141.0  | 140.3  | 140.4  |
|                   | (1.8)  | (2.1)  | (2.1)  | (2.5)  | (2.0)  | (2.0)  |
| Mesalazine        | 140.5  | 140.4  | 140.4  | 140.8  | 140.9  | 140.6  |
|                   | (2.1)  | (2.0)  | (2.1)  | (2.2)  | (2.2)  | (2.3)  |

DHEA = dehydroepiandrosterone sulfate; LOCF = last observation carried forward.

---

## Figure legend

**Fig. S1.** Patient flow diagram.

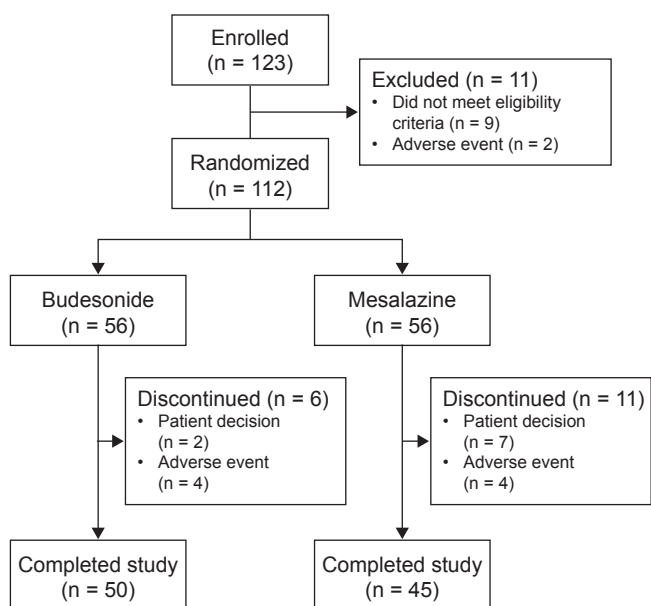

Supplement: iid-0002-0154-s01.pdf [file iid-0002-0154-s01.pdf]
